# Supplementary material for: Mechanistic aspects of the hydrolysis and condensation of titanium alkoxides complexed by tripodal ligands†
Source: Royal Society of Chemistry journal article supplement (doi:10.1039/b103398k), 2001-01-01
Supplement: b103398k.doc [file b103398k.doc]

# Supplementary materials

*Spectroscopic data of reagents*: THMNM-H3: IR (neat) /cm-1 1545s (as N-O), 1455s, 1364s (s N-O), 1270m; 1H NMR (CD3COCD3)  4.01 (6H, C**H**2), 4.36 (3H, O**H**); 13C NMR (CD3COCD3)  60.9 (**C**H2), 95.7 (**C**NO2); 17O NMR (CD3COCD3)  -13.6 (**O**H), 597.4 (N**O**2); 14N NMR (CD3COCD3)  1.97 (**N**O2).

Ti(OEt)4: 1H NMR (CD2Cl2)  1.25 (triplet, *J* 6.7 Hz, 3H, C**H**3), 4.38 (quadruplet, *J* 6.7 Hz, 2H, C**H**2); 13C NMR (CD2Cl2)  26.5 (**C**H3), 70.3 (O**C**H2); 17O NMR (CD2Cl2)  350 (wide) (**O**CH2CH3).

Ti(OPri)4: 1H NMR (CD2Cl2)  1.24 (doublet, *J* 6.1 Hz, 6H, C**H**3), 4.48 (septuplet, *J* 6.1 Hz, 1H, C**H**); 13C NMR (CD2Cl2)  26.47 (**C**H3), 75.94 (O**C**H); 17O NMR (CD2Cl2)  293 (**O**CH(CH3)2).

Ti(OBun)4: 1H NMR (CD2Cl2)  0.93 (triplet, *J* 7.3 Hz, 3H, C**H**3), 1.35 (sextuplet, *J* 7.2 Hz, 2H, C**H**2), 1.59 (quintuplet, *J* 6.9 Hz, 2H, C**H**2), 1.35 (triplet, *J* 6.7 Hz, 2H, C**H**2); 13C NMR (CD2Cl2)  14.13 (**C**H3), 19.29 (**C**H2) , 35.84 (**C**H2) , 74.40 (O**C**H2); 17O NMR (CD2Cl2)  350 (wide) (**O**CH2CH3).

WinPacha atomic charges calculations report for TI4OME16

Titanium methoxide Ti4(OMe)16

The crystal and molecular structure of titanium methoxide

Acta Cryst. (1968) B24, 1107-1114

D.A. Wright & D.A. Williams

V= 774.87 Å³ (Z = 4) -> Rval = 13.90%

***Atomic electronegativies (eV) and radii (pm) ***

C( 15.050, 62.0)

O( 21.360, 45.0)

Ti( 8.170, 147.7)

H( 13.610, 53.0)

Madelung summation with gaussian inner-charge scaling (G = 0.21 Å-1)

Reciprocal space exploration: -2 <= (h, k, l) <= 2

Madelung constant A = 108.8922646/4 = 27.2230662 (dmin = 1.10 Å )

min = -0.40293 Å-1 < mean = 0.31156 Å-1 < max = 1.73813 Å-1

Total electrostatic balance = -1425.5 eV = -137536.2 kJ.mol-1

Mean electronegativity: <EN> = 12.4 eV

Global hardness: <GH> = 5.66 eV (G = 0.21 Å-1)

Electronic signature: #n Label(±ox)[CN] = ±q {±f}

Atom Charge Fukui

#16 O8(-2)[ 4] = -0.74 { -0.01}

#14 O6(-2)[ 3] = -0.66 { -0.00}

#15 O7(-2)[ 3] = -0.66 { -0.00}

#9 O1(-2)[ 2] = -0.58 { 0.01}

#10 O2(-2)[ 2] = -0.58 { 0.01}

#11 O3(-2)[ 2] = -0.53 { 0.01}

#12 O4(-2)[ 2] = -0.50 { 0.02}

#13 O5(-2)[ 2] = -0.48 { 0.02}

#8 C8(-2)[ 4] = -0.13 { 0.01}

#6 C6(-2)[ 4] = -0.09 { 0.02}

#7 C7(-2)[ 4] = -0.08 { 0.02}

#3 C3(-2)[ 4] = -0.05 { 0.02}

#2 C2(-2)[ 4] = -0.04 { 0.02}

#1 C1(-2)[ 4] = -0.04 { 0.02}

#4 C4(-2)[ 4] = -0.02 { 0.02}

#38 H81(+1)[ 1] = -0.00 { 0.04}

#39 H82(+1)[ 1] = +0.00 { 0.04}

#32 H61(+1)[ 1] = +0.01 { 0.05}

#5 C5(-2)[ 4] = +0.01 { 0.02}

#28 H40(+1)[ 1] = +0.01 { 0.04}

#37 H80(+1)[ 1] = +0.01 { 0.05}

#31 H60(+1)[ 1] = +0.01 { 0.05}

#35 H71(+1)[ 1] = +0.01 { 0.05}

#25 H30(+1)[ 1] = +0.01 { 0.05}

#40 H50(+1)[ 1] = +0.01 { 0.04}

#34 H70(+1)[ 1] = +0.01 { 0.05}

#22 H20(+1)[ 1] = +0.01 { 0.06}

#19 H10(+1)[ 1] = +0.02 { 0.05}

#42 H52(+1)[ 1] = +0.02 { 0.06}

#41 H51(+1)[ 1] = +0.02 { 0.05}

#36 H72(+1)[ 1] = +0.03 { 0.05}

#26 H31(+1)[ 1] = +0.03 { 0.06}

#29 H41(+1)[ 1] = +0.03 { 0.06}

#30 H42(+1)[ 1] = +0.03 { 0.05}

#24 H22(+1)[ 1] = +0.03 { 0.05}

#20 H11(+1)[ 1] = +0.03 { 0.05}

#21 H12(+1)[ 1] = +0.03 { 0.05}

#23 H21(+1)[ 1] = +0.03 { 0.06}

#33 H62(+1)[ 1] = +0.03 { 0.05}

#27 H32(+1)[ 1] = +0.04 { 0.05}

#17 Ti1(+4)[ 6] = +2.25 { 0.30}

#18 Ti2(+4)[ 6] = +2.49 { 0.28}

Partial electrostatic balance: <EB> = -139.2 eV = -13435.0 kJ.mol-1

Reduced electrostatic balance: <EB/4> = -34.8 eV = -3358.8 kJ.mol-1

Global ionicity: <GI> = 31.3 %

Statistical report: <Atom>[num] = mean ± 3×stdev (stdev) <avdev>

<q(H)>[24] = 0.02 ± 0.04 (0.01) <0.01>

<f(H)>[24] = 0.05 ± 0.01 (0.00) <0.00>

<q(C)>[8] = -0.06 ± 0.13 (0.04) <0.03>

<f(C)>[8] = 0.02 ± 0.01 (0.00) <0.00>

<q(O)>[8] = -0.59 ± 0.27 (0.09) <0.07>

<f(O)>[8] = 0.01 ± 0.04 (0.01) <0.01>

<q(Ti)>[2] = 2.37 ± 0.50 (0.17) <0.12>

<f(Ti)>[2] = 0.29 ± 0.05 (0.02) <0.01>

WinPacha retrosynthetic report for TI4OME16

Titanium methoxide Ti4(OMe)16

The crystal and molecular structure of titanium methoxide

Acta Cryst. (1968) B24, 1107-1114

D.A. Wright & D.A. Williams

V= 774.87 Å³ (Z = 4) -> Rval = 13.90%

Current molecular fragment is: [H12C4O4Ti]*4 = 688.16 g.mol-1

*** Total electrical charge on molecular fragment = 0 ***

Partial electrostatic balance: <EB> = -139.203 eV = -13430.9 kJ.mol-1

#n Mol symb <=> Net symb = fragment PC => Retrosynthetic index(%)

#1 O10 <=> O7 = -0.663 => 0%

#2 O4 <=> O7 = -0.663 => 0%

#3 O5 <=> O8 = -0.740 => 0%

#4 O6 <=> O8 = -0.740 => 0%

#5 O3 <=> O6 = -0.665 => 0%

#6 O14 <=> O6 = -0.665 => 0%

#7 O1 <=> O1 = -0.584 => 0%

#8 O15 <=> O1 = -0.584 => 0%

#9 Ti3 <=> Ti1 = +2.251 => 0%

#10 Ti2 <=> Ti1 = +2.251 => 0%

#11 Ti4 <=> Ti2 = +2.484 => 0%

#12 Ti1 <=> Ti2 = +2.484 => 0%

#13 O2 <=> O2 = -0.580 => 0%

#14 O16 <=> O2 = -0.580 => 0%

#15 O9 <=> O5 = -0.483 => 0%

#16 O13 <=> O5 = -0.483 => 0%

#17 O8 <=> O4 = -0.495 => 0%

#18 O12 <=> O4 = -0.495 => 0%

#19 O7 <=> O3 = -0.526 => 0%

#20 O11 <=> O3 = -0.526 => 0%

#21 C4 <=> C7 = -0.082 => 0%

#22 C10 <=> C7 = -0.082 => 0%

#23 C2 <=> C2 = -0.042 => 0%

#24 C16 <=> C2 = -0.042 => 0%

#25 C5 <=> C8 = -0.127 => 0%

#26 C6 <=> C8 = -0.127 => 0%

#27 C11 <=> C3 = -0.048 => 0%

#28 C7 <=> C3 = -0.048 => 0%

#29 C12 <=> C4 = -0.021 => 1%

#30 C8 <=> C4 = -0.021 => 1%

#31 H6 <=> H22 = +0.031 => 1%

#32 H48 <=> H22 = +0.031 => 1%

#33 H12 <=> H72 = +0.025 => 1%

#34 H30 <=> H72 = +0.025 => 1%

#35 C15 <=> C1 = -0.041 => 1%

#36 C1 <=> C1 = -0.041 => 1%

#37 C14 <=> C6 = -0.086 => 2%

#38 C3 <=> C6 = -0.086 => 2%

#39 H2 <=> H11 = +0.030 => 2%

#40 H44 <=> H11 = +0.030 => 2%

#41 H3 <=> H12 = +0.033 => 2%

#42 H45 <=> H12 = +0.033 => 2%

#43 H36 <=> H42 = +0.028 => 2%

#44 H24 <=> H42 = +0.028 => 2%

#45 H4 <=> H20 = +0.014 => 3%

#46 H46 <=> H20 = +0.014 => 3%

#47 H21 <=> H32 = +0.039 => 3%

#48 H33 <=> H32 = +0.039 => 3%

#49 H32 <=> H31 = +0.027 => 5%

#50 H20 <=> H31 = +0.027 => 5%

#51 H28 <=> H70 = +0.011 => 5%

#52 H10 <=> H70 = +0.011 => 5%

#53 H47 <=> H21 = +0.032 => 6%

#54 H5 <=> H21 = +0.032 => 6%

#55 C13 <=> C5 = +0.006 => 7%

#56 C9 <=> C5 = +0.006 => 7%

#57 H37 <=> H50 = +0.009 => 7%

#58 H25 <=> H50 = +0.009 => 7%

#59 H27 <=> H52 = +0.022 => 8%

#60 H39 <=> H52 = +0.022 => 8%

#61 H38 <=> H51 = +0.026 => 8%

#62 H26 <=> H51 = +0.026 => 8%

#63 H29 <=> H71 = +0.009 => 8%

#64 H11 <=> H71 = +0.009 => 8%

#65 H23 <=> H41 = +0.030 => 8%

#66 H35 <=> H41 = +0.030 => 8%

#67 H43 <=> H10 = +0.018 => 10%

#68 H1 <=> H10 = +0.018 => 10%

#69 H13 <=> H80 = +0.006 => 10%

#70 H16 <=> H80 = +0.006 => 10%

#71 H18 <=> H82 = +0.004 => 15%

#72 H15 <=> H82 = +0.004 => 15%

#73 H34 <=> H40 = +0.005 => 20%

#74 H22 <=> H40 = +0.005 => 20%

#75 H42 <=> H62 = +0.027 => 20%

#76 H9 <=> H62 = +0.027 => 20%

#77 H19 <=> H30 = +0.010 => 30%

#78 H31 <=> H30 = +0.010 => 30%

#79 H40 <=> H60 = +0.004 => 39%

#80 H7 <=> H60 = +0.004 => 39%

#81 H8 <=> H61 = +0.007 => 43%

#82 H41 <=> H61 = +0.007 => 43%

#83 H17 <=> H81 = -0.005 => 47%

#84 H14 <=> H81 = -0.005 => 47%

WinPacha atomic charges calculations report for compound 1

V= 4287.20 Å³ (Z = 8) -> No R-value

***Atomic electronegativies (eV) and radii (pm) ***

Ti( 8.170, 147.7)

O( 21.360, 45.0)

C( 15.050, 62.0)

N( 18.130, 52.1)

H( 13.610, 53.0)

Madelung summation with gaussian inner-charge scaling (G = 0.12 Å-1)

Reciprocal space exploration: -2 <= (h, k, l) <= 2

Madelung constant A = 609.6443472/8 = 76.2055434 (dmin = 0.950 Å )

min = 0.47703 Å-1 < mean = 3.15327 Å-1 < max = 9.91144 Å-1

Total electrostatic balance = -9242.49 eV = -891756.9 kJ.mol-1

Mean electronegativity: <EN> = 13.03 eV

Global hardness: <GH> = 6.09 eV (G = 0.12 Å-1)

Electronic signature: #n Label(±ox)[CN] = ±q {±f}

Atom Charge Fukui

#7 O5(-2)[ 4] = -0.717 { -0.005}

#10 O8(-2)[ 3] = -0.658 { -0.001}

#6 O4(-2)[ 3] = -0.654 { -0.000}

#5 O3(-2)[ 2] = -0.581 { 0.004}

#11 O9(-2)[ 2] = -0.579 { 0.005}

#12 O10(-2)[ 2] = -0.578 { 0.005}

#4 O2(-2)[ 2] = -0.568 { 0.005}

#3 O1(-2)[ 2] = -0.556 { 0.005}

#9 O7(-2)[ 1] = -0.227 { 0.021}

#8 O6(-2)[ 1] = -0.210 { 0.020}

#24 C12(-3)[ 4] = -0.190 { -0.010}

#18 C6(-3)[ 4] = -0.175 { -0.007}

#26 C14(-3)[ 4] = -0.171 { -0.006}

#14 C2(-3)[ 4] = -0.159 { -0.002}

#16 C4(-3)[ 4] = -0.158 { -0.002}

#21 C9(-1)[ 4] = -0.103 { 0.002}

#22 C10(-1)[ 4] = -0.089 { 0.003}

#19 C7(-1)[ 4] = -0.088 { 0.002}

#15 C3(-1)[ 4] = -0.034 { 0.008}

#27 N1(+3)[ 3] = -0.028 { 0.017}

#13 C1(-1)[ 4] = -0.027 { 0.007}

#17 C5(-1)[ 4] = -0.009 { 0.006}

#20 C8(+1)[ 4] = -0.001 { 0.015}

#25 C13(-1)[ 4] = +0.001 { 0.008}

#34 H7(+1)[ 1] = +0.008 { 0.019}

#23 C11(-1)[ 4] = +0.020 { 0.008}

#33 H6(+1)[ 1] = +0.025 { 0.018}

#29 H2(+1)[ 1] = +0.027 { 0.018}

#54 H27(+1)[ 1] = +0.027 { 0.020}

#45 H18(+1)[ 1] = +0.032 { 0.019}

#30 H3(+1)[ 1] = +0.037 { 0.022}

#46 H19(+1)[ 1] = +0.037 { 0.018}

#50 H23(+1)[ 1] = +0.041 { 0.018}

#32 H5(+1)[ 1] = +0.043 { 0.022}

#38 H11(+1)[ 1] = +0.044 { 0.019}

#49 H22(+1)[ 1] = +0.047 { 0.018}

#55 H28(+1)[ 1] = +0.048 { 0.019}

#41 H14(+1)[ 1] = +0.048 { 0.024}

#31 H4(+1)[ 1] = +0.052 { 0.025}

#57 H30(+1)[ 1] = +0.054 { 0.026}

#48 H21(+1)[ 1] = +0.054 { 0.019}

#53 H26(+1)[ 1] = +0.055 { 0.026}

#42 H15(+1)[ 1] = +0.055 { 0.024}

#35 H8(+1)[ 1] = +0.056 { 0.024}

#37 H10(+1)[ 1] = +0.056 { 0.025}

#44 H17(+1)[ 1] = +0.060 { 0.020}

#56 H29(+1)[ 1] = +0.061 { 0.025}

#39 H12(+1)[ 1] = +0.062 { 0.020}

#52 H25(+1)[ 1] = +0.064 { 0.026}

#58 H31(+1)[ 1] = +0.068 { 0.025}

#40 H13(+1)[ 1] = +0.069 { 0.024}

#36 H9(+1)[ 1] = +0.075 { 0.026}

#28 H1(+1)[ 1] = +0.075 { 0.023}

#51 H24(+1)[ 1] = +0.076 { 0.025}

#47 H20(+1)[ 1] = +0.082 { 0.019}

#43 H16(+1)[ 1] = +0.088 { 0.021}

#2 Ti2(+4)[ 6] = +2.397 { 0.102}

#1 Ti1(+4)[ 6] = +2.512 { 0.112}

Partial electrostatic balance: <EB> = -615.46 eV = -59382.4 kJ.mol-1

Reduced electrostatic balance: <EB/4> = -153.87 eV = -14845.6 kJ.mol-1

Global ionicity: <GI> = 25.81 %

Statistical report: <Atom>[num] = mean ± 3×stdev (stdev) <avdev>

<q(H)>[31] = 0.053 ± 0.054 (0.018) <0.014>

<f(H)>[31] = 0.022 ± 0.009 (0.003) <0.003>

<q(C)>[14] = -0.084 ± 0.228 (0.076) <0.065>

<f(C)>[14] = 0.002 ± 0.021 (0.007) <0.006>

<q(N)>[1] = -0.028 ± 0.000 (0.000) <0.000>

<f(N)>[1] = 0.017 ± 0.000 (0.000) <0.000>

<q(O)>[10] = -0.533 ± 0.520 (0.173) <0.126>

<f(O)>[10] = 0.006 ± 0.025 (0.008) <0.006>

<q(Ti)>[2] = 2.455 ± 0.243 (0.081) <0.057>

<f(Ti)>[2] = 0.107 ± 0.021 (0.007) <0.005>

WinPacha retrosynthetic report for compound 1

V= 4287.20 Å³ (Z = 8) -> No R-value

Current molecular fragment is: [H31C14NO10Ti2]*2 = 938.44 g.mol-1

*** Total electrical charge on molecular fragment = 0 ***

Partial electrostatic balance: <EB> = -153.987 eV = -14857.4 kJ.mol-1

#n Mol symb <=> Net symb = fragment PC => Retrosynthetic index(%)

#1 O6 <=> O5 = -0.717 => 0%

#2 O9 <=> O5 = -0.717 => 0%

#3 O11 <=> O4 = -0.654 => 0%

#4 O4 <=> O4 = -0.654 => 0%

#5 Ti4 <=> Ti1 = +2.511 => 0%

#6 Ti1 <=> Ti1 = +2.511 => 0%

#7 O5 <=> O8 = -0.658 => 0%

#8 O10 <=> O8 = -0.658 => 0%

#9 C7 <=> C4 = -0.158 => 0%

#10 C27 <=> C4 = -0.158 => 0%

#11 O8 <=> O10 = -0.577 => 0%

#12 O13 <=> O10 = -0.577 => 0%

#13 Ti3 <=> Ti2 = +2.400 => 0%

#14 Ti2 <=> Ti2 = +2.400 => 0%

#15 O3 <=> O3 = -0.581 => 0%

#16 O16 <=> O3 = -0.581 => 0%

#17 O7 <=> O9 = -0.578 => 0%

#18 O12 <=> O9 = -0.578 => 0%

#19 O2 <=> O2 = -0.567 => 0%

#20 O15 <=> O2 = -0.567 => 0%

#21 O1 <=> O1 = -0.558 => 0%

#22 O14 <=> O1 = -0.558 => 0%

#23 C14 <=> C10 = -0.088 => 1%

#24 C5 <=> C10 = -0.088 => 1%

#25 C2 <=> C3 = -0.033 => 1%

#26 C24 <=> C3 = -0.033 => 1%

#27 C28 <=> C6 = -0.177 => 1%

#28 C8 <=> C6 = -0.177 => 1%

#29 C13 <=> C9 = -0.104 => 1%

#30 C10 <=> C9 = -0.104 => 1%

#31 C22 <=> C14 = -0.173 => 2%

#32 C19 <=> C14 = -0.173 => 2%

#33 H50 <=> H6 = +0.026 => 2%

#34 H3 <=> H6 = +0.026 => 2%

#35 C21 <=> C12 = -0.187 => 2%

#36 C18 <=> C12 = -0.187 => 2%

#37 H31 <=> H17 = +0.062 => 2%

#38 H8 <=> H17 = +0.062 => 2%

#39 O20 <=> O7 = -0.221 => 3%

#40 O18 <=> O7 = -0.221 => 3%

#41 C11 <=> C11 = +0.019 => 3%

#42 C16 <=> C11 = +0.019 => 3%

#43 H45 <=> H29 = +0.059 => 3%

#44 H39 <=> H29 = +0.059 => 3%

#45 C15 <=> C7 = -0.085 => 3%

#46 C4 <=> C7 = -0.085 => 3%

#47 H14 <=> H8 = +0.058 => 3%

#48 H57 <=> H8 = +0.058 => 3%

#49 C6 <=> C2 = -0.165 => 4%

#50 C26 <=> C2 = -0.165 => 4%

#51 O17 <=> O6 = -0.222 => 6%

#52 O19 <=> O6 = -0.222 => 6%

#53 H32 <=> H22 = +0.043 => 8%

#54 H22 <=> H22 = +0.043 => 8%

#55 H37 <=> H25 = +0.059 => 8%

#56 H43 <=> H25 = +0.059 => 8%

#57 H58 <=> H9 = +0.069 => 8%

#58 H15 <=> H9 = +0.069 => 8%

#59 H35 <=> H28 = +0.044 => 8%

#60 H25 <=> H28 = +0.044 => 8%

#61 H13 <=> H5 = +0.047 => 8%

#62 H56 <=> H5 = +0.047 => 8%

#63 C1 <=> C1 = -0.025 => 9%

#64 C23 <=> C1 = -0.025 => 9%

#65 H59 <=> H10 = +0.061 => 9%

#66 H16 <=> H10 = +0.061 => 9%

#67 H44 <=> H26 = +0.061 => 10%

#68 H38 <=> H26 = +0.061 => 10%

#69 H10 <=> H21 = +0.060 => 10%

#70 H29 <=> H21 = +0.060 => 10%

#71 H28 <=> H20 = +0.073 => 11%

#72 H9 <=> H20 = +0.073 => 11%

#73 N1 <=> N1 = -0.025 => 11%

#74 N2 <=> N1 = -0.025 => 11%

#75 H61 <=> H14 = +0.054 => 11%

#76 H18 <=> H14 = +0.054 => 11%

#77 H47 <=> H31 = +0.076 => 13%

#78 H41 <=> H31 = +0.076 => 13%

#79 H24 <=> H27 = +0.023 => 13%

#80 H34 <=> H27 = +0.023 => 13%

#81 H17 <=> H13 = +0.059 => 13%

#82 H60 <=> H13 = +0.059 => 13%

#83 H40 <=> H30 = +0.062 => 14%

#84 H46 <=> H30 = +0.062 => 14%

#85 H23 <=> H23 = +0.048 => 15%

#86 H33 <=> H23 = +0.048 => 15%

#87 H21 <=> H19 = +0.043 => 15%

#88 H27 <=> H19 = +0.043 => 15%

#89 H12 <=> H4 = +0.061 => 17%

#90 H55 <=> H4 = +0.061 => 17%

#91 H1 <=> H1 = +0.061 => 19%

#92 H48 <=> H1 = +0.061 => 19%

#93 H36 <=> H24 = +0.061 => 20%

#94 H42 <=> H24 = +0.061 => 20%

#95 H30 <=> H16 = +0.071 => 20%

#96 H7 <=> H16 = +0.071 => 20%

#97 H62 <=> H15 = +0.067 => 20%

#98 H19 <=> H15 = +0.067 => 20%

#99 H26 <=> H18 = +0.039 => 21%

#100 H20 <=> H18 = +0.039 => 21%

#101 H49 <=> H2 = +0.032 => 22%

#102 H2 <=> H2 = +0.032 => 22%

#103 H53 <=> H12 = +0.048 => 23%

#104 H6 <=> H12 = +0.048 => 23%

#105 H52 <=> H11 = +0.028 => 37%

#106 H5 <=> H11 = +0.028 => 37%

#107 H4 <=> H7 = +0.013 => 56%

#108 H51 <=> H7 = +0.013 => 56%

#109 C25 <=> C5 = -0.003 => 64%

#110 C3 <=> C5 = -0.003 => 64%

#111 H54 <=> H3 = +0.061 => 66%

#112 H11 <=> H3 = +0.061 => 66%

#113 C17 <=> C13 = +0.003 => 274%

#114 C12 <=> C13 = +0.003 => 275%

#115 C9 <=> C8 = -0.002 => 291%

#116 C20 <=> C8 = -0.002 => 291%

WinPacha atomic charges calculations report for compound 2

V= 2693.09 Å³ (Z = 4) -> No R-value

***Atomic electronegativies (eV) and radii (pm) ***

Ti( 8.170, 147.7)

O( 21.360, 45.0)

N( 18.130, 52.1)

C( 15.050, 62.0)

H( 13.610, 53.0)

Madelung summation with gaussian inner-charge scaling (G = 0.14 Å-1)

Reciprocal space exploration: -2 <= (h, k, l) <= 2

Madelung constant A = 431.4783740/4 = 107.8695935 (dmin = 0.950 Å )

min = -0.35767 Å-1 < mean = 0.90968 Å-1 < max = 4.20121 Å-1

Total electrostatic balance = -6541.00 eV = -631104.9 kJ.mol-1

Mean electronegativity: <EN> = 13.22 eV

Global hardness: <GH> = 3.62 eV (G = 0.14 Å-1)

Electronic signature: #n Label(±ox)[CN] = ±q {±f}

Atom Charge Fukui

#6 O4(-2)[ 4] = -0.712 { -0.003}

#7 O5(-2)[ 3] = -0.655 { 0.000}

#10 O8(-2)[ 3] = -0.653 { -0.000}

#3 O1(-2)[ 2] = -0.575 { 0.003}

#11 O9(-2)[ 2] = -0.574 { 0.003}

#4 O2(-2)[ 2] = -0.559 { 0.003}

#12 O10(-2)[ 2] = -0.558 { 0.004}

#5 O3(-2)[ 2] = -0.548 { 0.004}

#9 O7(-2)[ 1] = -0.242 { 0.018}

#8 O6(-2)[ 1] = -0.236 { 0.017}

#21 C8(-3)[ 4] = -0.173 { -0.002}

#16 C3(-3)[ 4] = -0.168 { -0.002}

#32 C19(-3)[ 4] = -0.166 { -0.002}

#31 C18(-3)[ 4] = -0.166 { -0.001}

#18 C5(-3)[ 4] = -0.165 { -0.002}

#19 C6(-3)[ 4] = -0.163 { -0.002}

#28 C15(-3)[ 4] = -0.162 { -0.003}

#29 C16(-3)[ 4] = -0.162 { -0.002}

#22 C9(-3)[ 4] = -0.159 { -0.003}

#15 C2(-3)[ 4] = -0.158 { -0.002}

#23 C10(-1)[ 4] = -0.104 { 0.002}

#26 C13(-1)[ 4] = -0.092 { 0.003}

#25 C12(-1)[ 4] = -0.088 { 0.002}

#13 N1(+3)[ 3] = -0.020 { 0.013}

#24 C11(+1)[ 4] = -0.005 { 0.012}

#17 C4(+0)[ 4] = +0.003 { 0.011}

#40 H8(+1)[ 1] = +0.007 { 0.012}

#30 C17(+0)[ 4] = +0.009 { 0.011}

#14 C1(+0)[ 4] = +0.012 { 0.011}

#27 C14(+0)[ 4] = +0.013 { 0.011}

#20 C7(+0)[ 4] = +0.013 { 0.011}

#47 H15(+1)[ 1] = +0.014 { 0.013}

#67 H35(+1)[ 1] = +0.024 { 0.015}

#33 H1(+1)[ 1] = +0.029 { 0.013}

#54 H22(+1)[ 1] = +0.036 { 0.015}

#60 H28(+1)[ 1] = +0.037 { 0.013}

#38 H6(+1)[ 1] = +0.042 { 0.017}

#69 H37(+1)[ 1] = +0.046 { 0.016}

#50 H18(+1)[ 1] = +0.047 { 0.017}

#55 H23(+1)[ 1] = +0.047 { 0.015}

#63 H31(+1)[ 1] = +0.048 { 0.017}

#46 H14(+1)[ 1] = +0.051 { 0.019}

#39 H7(+1)[ 1] = +0.053 { 0.017}

#56 H24(+1)[ 1] = +0.053 { 0.015}

#51 H19(+1)[ 1] = +0.054 { 0.022}

#62 H30(+1)[ 1] = +0.054 { 0.018}

#64 H32(+1)[ 1] = +0.054 { 0.019}

#61 H29(+1)[ 1] = +0.056 { 0.020}

#34 H2(+1)[ 1] = +0.056 { 0.019}

#68 H36(+1)[ 1] = +0.057 { 0.017}

#44 H12(+1)[ 1] = +0.057 { 0.019}

#52 H20(+1)[ 1] = +0.058 { 0.019}

#66 H34(+1)[ 1] = +0.058 { 0.018}

#35 H3(+1)[ 1] = +0.059 { 0.018}

#42 H10(+1)[ 1] = +0.061 { 0.018}

#36 H4(+1)[ 1] = +0.062 { 0.021}

#48 H16(+1)[ 1] = +0.062 { 0.019}

#71 H39(+1)[ 1] = +0.063 { 0.019}

#45 H13(+1)[ 1] = +0.064 { 0.018}

#57 H25(+1)[ 1] = +0.065 { 0.016}

#65 H33(+1)[ 1] = +0.065 { 0.019}

#37 H5(+1)[ 1] = +0.066 { 0.020}

#70 H38(+1)[ 1] = +0.067 { 0.018}

#72 H40(+1)[ 1] = +0.070 { 0.019}

#43 H11(+1)[ 1] = +0.074 { 0.019}

#53 H21(+1)[ 1] = +0.074 { 0.021}

#41 H9(+1)[ 1] = +0.078 { 0.021}

#59 H27(+1)[ 1] = +0.078 { 0.015}

#58 H26(+1)[ 1] = +0.083 { 0.015}

#49 H17(+1)[ 1] = +0.094 { 0.020}

#73 H41(+1)[ 1] = +0.098 { 0.020}

#2 Ti2(+4)[ 6] = +2.396 { 0.079}

#1 Ti1(+4)[ 6] = +2.497 { 0.086}

Partial electrostatic balance: <EB> = -309.90 eV = -29900.4 kJ.mol-1

Reduced electrostatic balance: <EB/2> = -154.95 eV = -14950.2 kJ.mol-1

Global ionicity: <GI> = 21.77 %

Statistical report: <Atom>[num] = mean ± 3×stdev (stdev) <avdev>

<q(H)>[41] = 0.057 ± 0.055 (0.018) <0.013>

<f(H)>[41] = 0.018 ± 0.007 (0.002) <0.002>

<q(C)>[19] = -0.099 ± 0.236 (0.079) <0.069>

<f(C)>[19] = 0.003 ± 0.019 (0.006) <0.005>

<q(N)>[1] = -0.020 ± 0.000 (0.000) <0.000>

<f(N)>[1] = 0.013 ± 0.000 (0.000) <0.000>

<q(O)>[10] = -0.531 ± 0.489 (0.163) <0.117>

<f(O)>[10] = 0.005 ± 0.021 (0.007) <0.005>

<q(Ti)>[2] = 2.446 ± 0.215 (0.072) <0.051>

<f(Ti)>[2] = 0.083 ± 0.015 (0.005) <0.003>

WinPacha retrosynthetic report for compound 2

V= 2693.09 Å³ (Z = 4) -> No R-value

Current molecular fragment is: [H41C19NO10Ti2]*2 = 1078.74 g.mol-1

*** Total electrical charge on molecular fragment = 0 ***

Partial electrostatic balance: <EB> = -154.665 eV = -14922.8 kJ.mol-1

#n Mol symb <=> Net symb = fragment PC => Retrosynthetic index(%)

#1 O15 <=> O2 = -0.559 => 0%

#2 O2 <=> O2 = -0.559 => 0%

#3 O16 <=> O3 = -0.548 => 0%

#4 O3 <=> O3 = -0.548 => 0%

#5 Ti4 <=> Ti1 = +2.497 => 0%

#6 Ti1 <=> Ti1 = +2.497 => 0%

#7 O4 <=> O4 = -0.712 => 0%

#8 O10 <=> O4 = -0.712 => 0%

#9 Ti3 <=> Ti2 = +2.395 => 0%

#10 Ti2 <=> Ti2 = +2.395 => 0%

#11 O12 <=> O9 = -0.574 => 0%

#12 O8 <=> O9 = -0.574 => 0%

#13 O9 <=> O10 = -0.558 => 0%

#14 O13 <=> O10 = -0.558 => 0%

#15 O11 <=> O5 = -0.654 => 0%

#16 O5 <=> O5 = -0.654 => 0%

#17 O1 <=> O1 = -0.574 => 0%

#18 O14 <=> O1 = -0.574 => 0%

#19 C34 <=> C3 = -0.168 => 0%

#20 C8 <=> C3 = -0.168 => 0%

#21 C25 <=> C19 = -0.167 => 0%

#22 C29 <=> C19 = -0.167 => 0%

#23 C26 <=> C15 = -0.163 => 0%

#24 C22 <=> C15 = -0.163 => 0%

#25 O7 <=> O8 = -0.654 => 0%

#26 O6 <=> O8 = -0.654 => 0%

#27 C24 <=> C18 = -0.165 => 0%

#28 C28 <=> C18 = -0.165 => 0%

#29 C18 <=> C10 = -0.104 => 1%

#30 C4 <=> C10 = -0.104 => 1%

#31 C2 <=> C4 = +0.003 => 1%

#32 H47 <=> H39 = +0.064 => 1%

#33 H59 <=> H39 = +0.064 => 1%

#34 C31 <=> C4 = +0.003 => 1%

#35 C5 <=> C12 = -0.089 => 1%

#36 C19 <=> C12 = -0.089 => 1%

#37 H57 <=> H37 = +0.045 => 2%

#38 H45 <=> H37 = +0.045 => 2%

#39 C1 <=> C1 = +0.012 => 2%

#40 C30 <=> C1 = +0.012 => 2%

#41 C7 <=> C2 = -0.161 => 2%

#42 C33 <=> C2 = -0.161 => 2%

#43 C12 <=> C9 = -0.162 => 2%

#44 C38 <=> C9 = -0.162 => 2%

#45 C27 <=> C16 = -0.165 => 2%

#46 C23 <=> C16 = -0.165 => 2%

#47 C36 <=> C6 = -0.167 => 2%

#48 C10 <=> C6 = -0.167 => 2%

#49 O19 <=> O6 = -0.231 => 2%

#50 O17 <=> O6 = -0.231 => 2%

#51 H52 <=> H31 = +0.047 => 2%

#52 H40 <=> H31 = +0.047 => 2%

#53 H77 <=> H16 = +0.061 => 3%

#54 H22 <=> H16 = +0.061 => 3%

#55 C9 <=> C5 = -0.159 => 3%

#56 C35 <=> C5 = -0.159 => 3%

#57 H14 <=> H6 = +0.043 => 3%

#58 H69 <=> H6 = +0.043 => 3%

#59 H39 <=> H30 = +0.056 => 4%

#60 H51 <=> H30 = +0.056 => 4%

#61 C11 <=> C8 = -0.166 => 4%

#62 C37 <=> C8 = -0.166 => 4%

#63 C20 <=> C14 = +0.013 => 4%

#64 C16 <=> C14 = +0.013 => 4%

#65 N1 <=> N1 = -0.019 => 5%

#66 N2 <=> N1 = -0.019 => 5%

#67 H56 <=> H36 = +0.059 => 5%

#68 H44 <=> H36 = +0.059 => 5%

#69 H10 <=> H2 = +0.059 => 5%

#70 H65 <=> H2 = +0.059 => 5%

#71 C6 <=> C13 = -0.087 => 5%

#72 C15 <=> C13 = -0.087 => 5%

#73 H38 <=> H29 = +0.059 => 5%

#74 H50 <=> H29 = +0.059 => 5%

#75 H33 <=> H23 = +0.050 => 5%

#76 H5 <=> H23 = +0.050 => 5%

#77 O18 <=> O7 = -0.228 => 5%

#78 O20 <=> O7 = -0.228 => 5%

#79 H82 <=> H21 = +0.079 => 6%

#80 H27 <=> H21 = +0.079 => 6%

#81 H15 <=> H7 = +0.056 => 6%

#82 H70 <=> H7 = +0.056 => 6%

#83 C17 <=> C17 = +0.010 => 6%

#84 C21 <=> C17 = +0.010 => 6%

#85 H17 <=> H10 = +0.057 => 7%

#86 H72 <=> H10 = +0.057 => 7%

#87 H7 <=> H25 = +0.070 => 7%

#88 H35 <=> H25 = +0.070 => 7%

#89 H1 <=> H1 = +0.027 => 7%

#90 H62 <=> H1 = +0.027 => 7%

#91 H43 <=> H34 = +0.062 => 7%

#92 H55 <=> H34 = +0.062 => 7%

#93 H60 <=> H40 = +0.075 => 8%

#94 H48 <=> H40 = +0.075 => 8%

#95 C32 <=> C7 = +0.012 => 8%

#96 C3 <=> C7 = +0.012 => 8%

#97 H30 <=> H28 = +0.040 => 9%

#98 H36 <=> H28 = +0.040 => 9%

#99 H18 <=> H11 = +0.067 => 9%

#100 H73 <=> H11 = +0.067 => 9%

#101 H6 <=> H24 = +0.058 => 9%

#102 H34 <=> H24 = +0.058 => 9%

#103 H12 <=> H4 = +0.068 => 10%

#104 H67 <=> H4 = +0.068 => 10%

#105 H24 <=> H18 = +0.042 => 10%

#106 H79 <=> H18 = +0.042 => 10%

#107 H11 <=> H3 = +0.065 => 10%

#108 H66 <=> H3 = +0.065 => 10%

#109 H68 <=> H5 = +0.059 => 11%

#110 H13 <=> H5 = +0.059 => 11%

#111 H46 <=> H38 = +0.060 => 11%

#112 H58 <=> H38 = +0.060 => 11%

#113 H26 <=> H20 = +0.064 => 11%

#114 H81 <=> H20 = +0.064 => 11%

#115 H74 <=> H12 = +0.064 => 11%

#116 H19 <=> H12 = +0.064 => 11%

#117 H32 <=> H22 = +0.040 => 11%

#118 H4 <=> H22 = +0.040 => 11%

#119 H61 <=> H41 = +0.086 => 12%

#120 H49 <=> H41 = +0.086 => 12%

#121 H20 <=> H13 = +0.072 => 12%

#122 H75 <=> H13 = +0.072 => 12%

#123 C14 <=> C11 = -0.006 => 12%

#124 C13 <=> C11 = -0.006 => 12%

#125 H21 <=> H14 = +0.057 => 12%

#126 H76 <=> H14 = +0.057 => 12%

#127 H25 <=> H19 = +0.060 => 13%

#128 H80 <=> H19 = +0.060 => 13%

#129 H54 <=> H33 = +0.075 => 15%

#130 H42 <=> H33 = +0.075 => 15%

#131 H53 <=> H32 = +0.063 => 17%

#132 H41 <=> H32 = +0.063 => 17%

#133 H2 <=> H8 = +0.008 => 17%

#134 H63 <=> H8 = +0.008 => 17%

#135 H64 <=> H15 = +0.016 => 19%

#136 H3 <=> H15 = +0.016 => 19%

#137 H29 <=> H27 = +0.061 => 23%

#138 H9 <=> H27 = +0.061 => 23%

#139 H16 <=> H9 = +0.059 => 25%

#140 H71 <=> H9 = +0.059 => 25%

#141 H28 <=> H26 = +0.062 => 26%

#142 H8 <=> H26 = +0.062 => 26%

#143 H78 <=> H17 = +0.069 => 27%

#144 H23 <=> H17 = +0.069 => 27%

#145 H31 <=> H35 = +0.017 => 32%

#146 H37 <=> H35 = +0.017 => 32%
